# Supplementary material for: Rhythmic brain-behavior coupling in the visuo-motor system: theta-band coherence links saccades and oculomotor brain regions
Source: Research Square preprint supplement (doi:10.21203/rs.3.rs-7757022/v1), 2025-10-29
Supplement: Supplementary file 1 [file 2141bae7044d110d15afbb9f.pdf]

Reporting Summary

Nature Portfolio wishes to improve the reproducibility of the work that we publish. This form provides structure for consistency and transparency in reporting. For further information on Nature Portfolio policies, see our [Editorial Policies](#) and the [Editorial Policy Checklist](#).

Statistics

For all statistical analyses, confirm that the following items are present in the figure legend, table legend, main text, or Methods section.

|                                     |                                                                                                                                                                                                                                                                                                |
|-------------------------------------|------------------------------------------------------------------------------------------------------------------------------------------------------------------------------------------------------------------------------------------------------------------------------------------------|
| n/a                                 | Confirmed                                                                                                                                                                                                                                                                                      |
| <input type="checkbox"/>            | <input checked="" type="checkbox"/> The exact sample size ( <i>n</i> ) for each experimental group/condition, given as a discrete number and unit of measurement                                                                                                                               |
| <input type="checkbox"/>            | <input checked="" type="checkbox"/> A statement on whether measurements were taken from distinct samples or whether the same sample was measured repeatedly                                                                                                                                    |
| <input type="checkbox"/>            | <input checked="" type="checkbox"/> The statistical test(s) used AND whether they are one- or two-sided<br><i>Only common tests should be described solely by name; describe more complex techniques in the Methods section.</i>                                                               |
| <input checked="" type="checkbox"/> | <input type="checkbox"/> A description of all covariates tested                                                                                                                                                                                                                                |
| <input type="checkbox"/>            | <input checked="" type="checkbox"/> A description of any assumptions or corrections, such as tests of normality and adjustment for multiple comparisons                                                                                                                                        |
| <input type="checkbox"/>            | <input checked="" type="checkbox"/> A full description of the statistical parameters including central tendency (e.g. means) or other basic estimates (e.g. regression coefficient) AND variation (e.g. standard deviation) or associated estimates of uncertainty (e.g. confidence intervals) |
| <input type="checkbox"/>            | <input checked="" type="checkbox"/> For null hypothesis testing, the test statistic (e.g. <i>F</i> , <i>t</i> , <i>r</i> ) with confidence intervals, effect sizes, degrees of freedom and <i>P</i> value noted<br><i>Give <i>P</i> values as exact values whenever suitable.</i>              |
| <input checked="" type="checkbox"/> | <input type="checkbox"/> For Bayesian analysis, information on the choice of priors and Markov chain Monte Carlo settings                                                                                                                                                                      |
| <input checked="" type="checkbox"/> | <input type="checkbox"/> For hierarchical and complex designs, identification of the appropriate level for tests and full reporting of outcomes                                                                                                                                                |
| <input type="checkbox"/>            | <input checked="" type="checkbox"/> Estimates of effect sizes (e.g. Cohen's <i>d</i> , Pearson's <i>r</i> ), indicating how they were calculated                                                                                                                                               |

Our web collection on [statistics for biologists](#) contains articles on many of the points above.

Software and code

Policy information about [availability of computer code](#)

|                 |                                                                                                                                                                                                                                                             |
|-----------------|-------------------------------------------------------------------------------------------------------------------------------------------------------------------------------------------------------------------------------------------------------------|
| Data collection | MEG data were collected using Acq Version 6.2.0-el8_9.x86_64-20240409-X by CTF-MEG-Neuroinnovations Ltd., Vancouver, Canada. Eye-Tracking Data were collected using the same software and using an Eyelink System by SR Research Ltd., Mississauga, Canada. |
| Data analysis   | For data analysis we used Matlab (version 2022b) and the fieldtrip toolbox (Oostenveld et al. 2011).                                                                                                                                                        |

For manuscripts utilizing custom algorithms or software that are central to the research but not yet described in published literature, software must be made available to editors and reviewers. We strongly encourage code deposition in a community repository (e.g. GitHub). See the Nature Portfolio [guidelines for submitting code & software](#) for further information.

Data

Policy information about [availability of data](#)

All manuscripts must include a [data availability statement](#). This statement should provide the following information, where applicable:

- Accession codes, unique identifiers, or web links for publicly available datasets
- A description of any restrictions on data availability
- For clinical datasets or third party data, please ensure that the statement adheres to our [policy](#)

The datasets generated during and/or analysed during the current study are available from the corresponding author on reasonable request.

## Research involving human participants, their data, or biological material

Policy information about studies with [human participants or human data](#). See also policy information about [sex, gender \(identity/presentation\), and sexual orientation](#) and [race, ethnicity and racism](#).

|                                                                    |                                                                                                                                                                                                              |
|--------------------------------------------------------------------|--------------------------------------------------------------------------------------------------------------------------------------------------------------------------------------------------------------|
| Reporting on sex and gender                                        | <a href="#">see submitted manuscript for details on the recruited sample</a>                                                                                                                                 |
| Reporting on race, ethnicity, or other socially relevant groupings | <a href="#">see submitted manuscript for details on the recruited sample</a>                                                                                                                                 |
| Population characteristics                                         | <a href="#">see submitted manuscript for details on the recruited sample</a>                                                                                                                                 |
| Recruitment                                                        | Participants were recruited at the University Clinic of Münster, Germany.                                                                                                                                    |
| Ethics oversight                                                   | Participants gave written informed consent in line with the declaration of Helsinki prior to the experiment and the study was approved by the ethics committee of the University of Münster (#2015-263-f-S). |

Note that full information on the approval of the study protocol must also be provided in the manuscript.

## Field-specific reporting

Please select the one below that is the best fit for your research. If you are not sure, read the appropriate sections before making your selection.

☒ Life sciences ☐ Behavioural & social sciences ☐ Ecological, evolutionary & environmental sciences

For a reference copy of the document with all sections, see [nature.com/documents/nr-reporting-summary-flat.pdf](https://nature.com/documents/nr-reporting-summary-flat.pdf)

## Life sciences study design

All studies must disclose on these points even when the disclosure is negative.

|                 |                                                                                                                                                                                                                                                                                                                                                                                                                                                                                                             |
|-----------------|-------------------------------------------------------------------------------------------------------------------------------------------------------------------------------------------------------------------------------------------------------------------------------------------------------------------------------------------------------------------------------------------------------------------------------------------------------------------------------------------------------------|
| Sample size     | The analyses at hand were explorative. The sample size was therefore chosen from experience of similar MEG studies.                                                                                                                                                                                                                                                                                                                                                                                         |
| Data exclusions | Participants were excluded from the study, if they reported a history of psychotic disorders in themselves or in first degree relatives, since eye movement data might be impacted. Participants were excluded from the study if they had non-removable metal parts in their body, that would impact the collection of MRI or MEG data.<br>Participants were excluded from analysis if the data quality did not allow a proper data analysis. This was due to technically caused (squid) jumps in the data. |
| Replication     | Authors provided complete information on experimental procedure.                                                                                                                                                                                                                                                                                                                                                                                                                                            |
| Randomization   | Our study design did not require group allocation.                                                                                                                                                                                                                                                                                                                                                                                                                                                          |
| Blinding        | Our study design did not require group allocation.                                                                                                                                                                                                                                                                                                                                                                                                                                                          |

## Reporting for specific materials, systems and methods

We require information from authors about some types of materials, experimental systems and methods used in many studies. Here, indicate whether each material, system or method listed is relevant to your study. If you are not sure if a list item applies to your research, read the appropriate section before selecting a response.

### Materials & experimental systems

|                                     |                                                        |
|-------------------------------------|--------------------------------------------------------|
| n/a                                 | Involved in the study                                  |
| <input checked="" type="checkbox"/> | <input type="checkbox"/> Antibodies                    |
| <input checked="" type="checkbox"/> | <input type="checkbox"/> Eukaryotic cell lines         |
| <input checked="" type="checkbox"/> | <input type="checkbox"/> Palaeontology and archaeology |
| <input checked="" type="checkbox"/> | <input type="checkbox"/> Animals and other organisms   |
| <input checked="" type="checkbox"/> | <input type="checkbox"/> Clinical data                 |
| <input checked="" type="checkbox"/> | <input type="checkbox"/> Dual use research of concern  |
| <input checked="" type="checkbox"/> | <input type="checkbox"/> Plants                        |

### Methods

|                                     |                                                            |
|-------------------------------------|------------------------------------------------------------|
| n/a                                 | Involved in the study                                      |
| <input checked="" type="checkbox"/> | <input type="checkbox"/> ChIP-seq                          |
| <input checked="" type="checkbox"/> | <input type="checkbox"/> Flow cytometry                    |
| <input type="checkbox"/>            | <input checked="" type="checkbox"/> MRI-based neuroimaging |

## Plants

Seed stocks

Report on the source of all seed stocks or other plant material used. If applicable, state the seed stock centre and catalogue number. If plant specimens were collected from the field, describe the collection location, date and sampling procedures.

Novel plant genotypes

Describe the methods by which all novel plant genotypes were produced. This includes those generated by transgenic approaches, gene editing, chemical/radiation-based mutagenesis and hybridization. For transgenic lines, describe the transformation method, the number of independent lines analyzed and the generation upon which experiments were performed. For gene-edited lines, describe the editor used, the endogenous sequence targeted for editing, the targeting guide RNA sequence (if applicable) and how the editor was applied.

Authentication

Describe any authentication procedures for each seed stock used or novel genotype generated. Describe any experiments used to assess the effect of a mutation and, where applicable, how potential secondary effects (e.g. second site T-DNA insertions, mosaicism, off-target gene editing) were examined.

## Magnetic resonance imaging

### Experimental design

Design type

only structural MRI was collected with no task (i.e. resting state)

Design specifications

no experiment was conducted in the MRI

Behavioral performance measures

no experiment was conducted in the MRI

### Acquisition

Imaging type(s)

T1-weighted, structural

Field strength

3 T

Sequence &amp; imaging parameters

Using a 3 T Siemens Magnetom Skyra scanner (Siemens, Erlangen, Germany; 64-channel head coil), structural T1 images were acquired (1 x 1 x 1 mm resolution; 192 x 256 x 256 mm FoV; 3D MP-RAGE sequence, TR = 2300ms, TE=3.6ms, TI=1100ms, FA=8°).

Area of acquisition

A whole brain scan was used

Diffusion MRI

☐ Used☒ Not used

### Preprocessing

Preprocessing software

Matlab (version 2022b) and Fieldtrip toolbox (Oostenveld et al. 2011) calling SPM toolbox.

Normalization

non-linear transformation implemented in Fieldtrip toolbox (SPM)

Normalization template

MNI-based source grid for MEG-analysis distributed with Fieldtrip toolbox

Noise and artifact removal

No noise and artifact removal

Volume censoring

No Volume censoring

### Statistical modeling & inference

Model type and settings

no statistics were computed using MRI data

Effect(s) tested

no statistics were computed using MRI data

Specify type of analysis:

☐ Whole brain☒ ROI-based☐ Both

Anatomical location(s)

We used the reduced Human Connectome Project atlas (HCP atlas) with 230 cortical parcels. Glasser et al. 2016, Tait et al. 2021

Statistic type for inference

no statistics were computed using MRI data

(See [Eklund et al. 2016](#))

Correction

no statistics were computed using MRI data

## Models & analysis

| n/a                                 | Involvement in the study                                              |
|-------------------------------------|-----------------------------------------------------------------------|
| <input checked="" type="checkbox"/> | <input type="checkbox"/> Functional and/or effective connectivity     |
| <input checked="" type="checkbox"/> | <input type="checkbox"/> Graph analysis                               |
| <input checked="" type="checkbox"/> | <input type="checkbox"/> Multivariate modeling or predictive analysis |
